# Supplementary material for: Hepatic paraoxonase 1 ameliorates dysfunctional high-density lipoprotein and atherosclerosis in scavenger receptor class B type I deficient mice
Source: PubMed Central journal article supplement — Ann Transl Med. 2021 Jul;9(13):1063. doi: 10.21037/atm-21-682 (PMC8339862; doi:10.21037/atm-21-682), 2021-07
Supplement: atm-09-13-1063-supplementary.pdf [file atm-09-13-1063-supplementary.pdf]

## Supplementary

**Table S1** The information of all primary antibodies and loading amount of proteins in western blot

| Primary antibody                     | Origin | Company                   | Cat. No.   | Dilution rate | Sample loading           |
|--------------------------------------|--------|---------------------------|------------|---------------|--------------------------|
| PON1 monoclonal antibody             | UK     | Abcam                     | Ab24261    | 1:1000        | 30 µg or 0.1 µL (plasma) |
| APOA1 polyclonal antibody            | UK     | Abcam                     | Ab7614     | 1:1000        | 30 µg or 0.5 µL (plasma) |
| APOE monoclonal antibody             | UK     | Abcam                     | Ab183597   | 1:1000        | 30 µg or 1 µL (plasma)   |
| LCAT monoclonal antibody             | UK     | Abcam                     | Ab109417   | 1:1000        | 0.5 µL (plasma)          |
| SAA monoclonal antibody              | USA    | Santa Cruz Biotechnology  | SC-59680   | 1:1000        | 1 µL (plasma)            |
| A1AT monoclonal antibody             | UK     | Abcam                     | Ab133642   | 1:1000        | 1 µL (plasma)            |
| APOA4 polyclonal antibody            | USA    | R&D Systems               | AF8125     | 1:1000        | 1 µL (plasma)            |
| LDLR monoclonal antibody             | UK     | Abcam                     | Ab52818    | 1:500         | 40 µg                    |
| LXR $\alpha$ polyclonal antibody     | UK     | Abcam                     | Ab28478    | 1:1000        | 30 µg                    |
| ABCA1 monoclonal antibody            | UK     | Abcam                     | Ab18180    | 1:1000        | 70 µg                    |
| ABCG8 monoclonal antibody            | USA    | Novus Biologicals         | NBP1-71706 | 1:1000        | 50 µg                    |
| ACAT polyclonal antibody             | UK     | Abcam                     | Ab93477    | 1:1000        | 30 µg                    |
| p-NF- $\kappa$ B monoclonal antibody | USA    | Cell Signaling Technology | 3033       | 1:1000        | 50 µg                    |
| GAPDH polyclonal antibody            | USA    | Santa Cruz Biotechnology  | SC-25778   | 1:1000        |                          |

A1AT, alpha 1 antitrypsin; ABCA1, ATP-binding cassette A1; ABCG8, ATP-binding cassette G8; ACAT, acyl-coenzyme A cholesterol acyltransferase; APOA1, apolipoprotein A1; APOA4, apolipoprotein A4; APOE, apolipoprotein E; GAPDH, glyceraldehyde-3-phosphate dehydrogenase; LCAT, lecithin-cholesterol acyltransferase; LDLR, LDL receptor; LXR $\alpha$ , liver X receptor alpha; p-NF- $\kappa$ B, phosphorylated nuclear factor kappa B; PON1, paraoxonase1; SAA, serum amyloid A.
